# Supplementary material
Source: PubMed Central journal article supplement (PMC4800990)
Supplement: NIHMS702166-supplement-9.pdf [file NIHMS702166-supplement-9.pdf]

**Fig. 1**

**Fig. 1a**

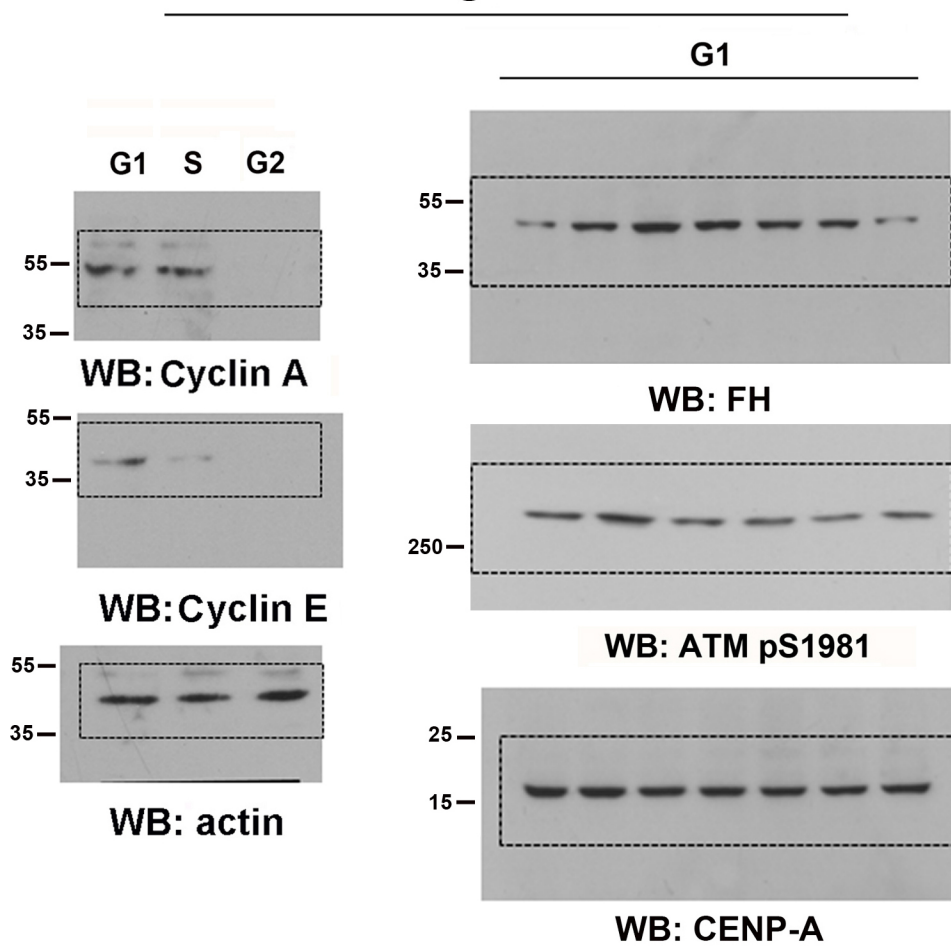

**Fig. 1b**

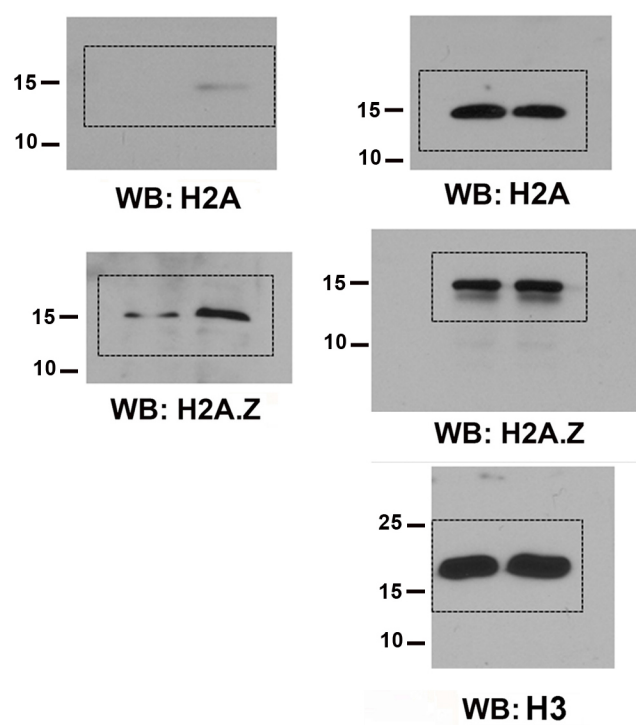

**Fig. 1c**

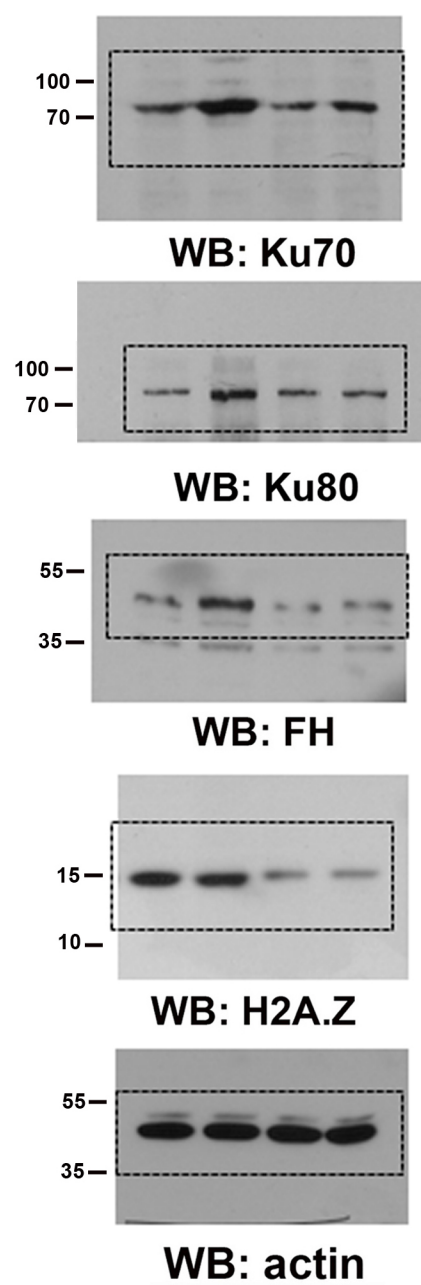

**Fig. 1d**

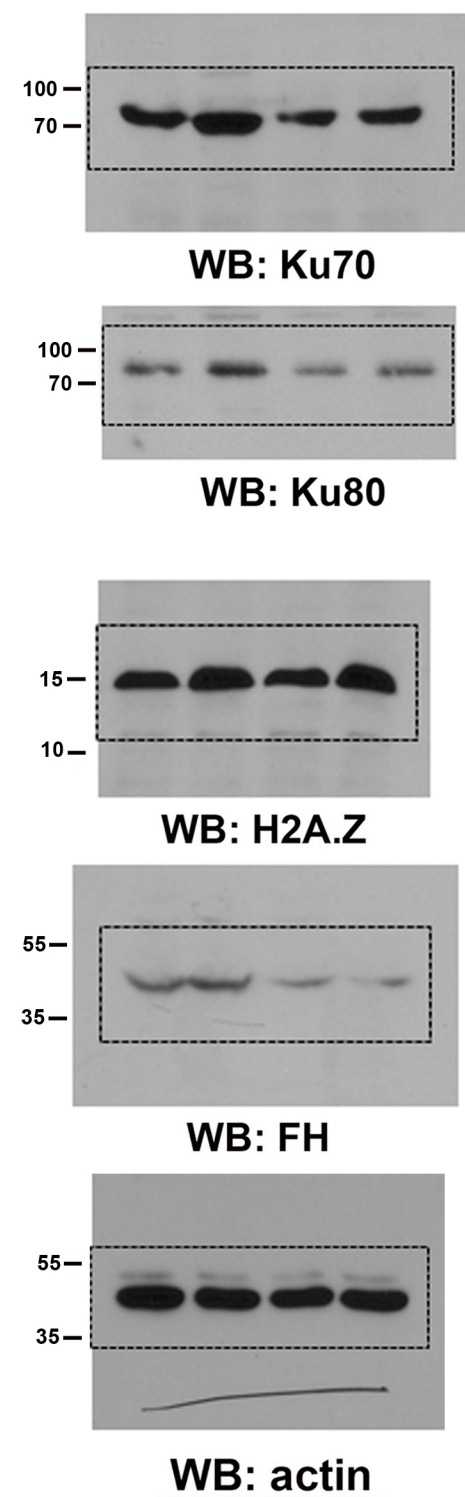

**Fig. 2**

**Fig.2a**

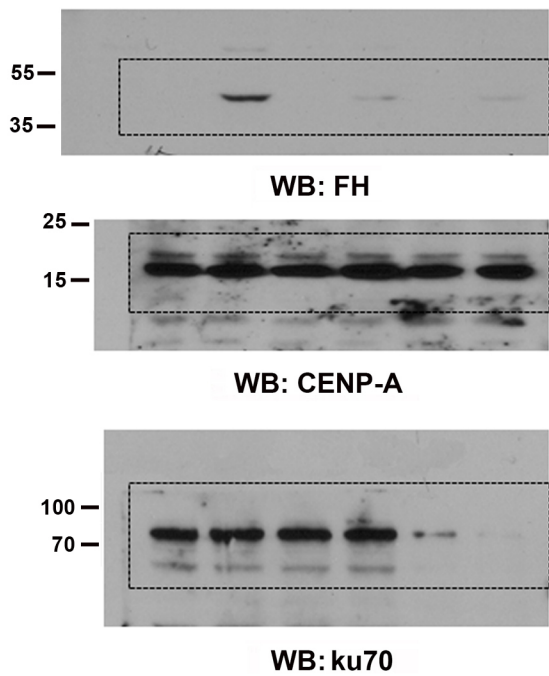

**Fig. 2b**

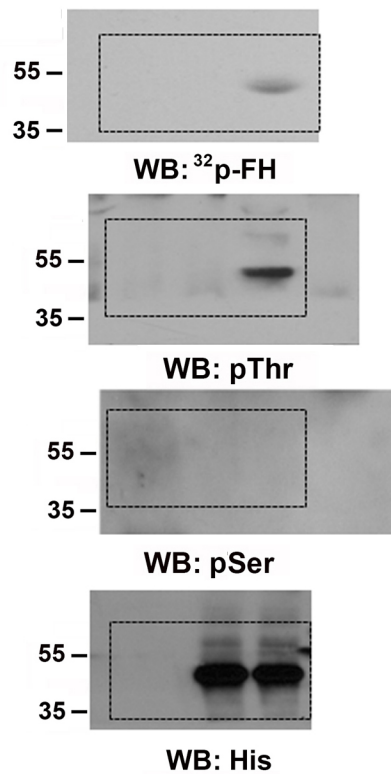

**Fig. 2c**

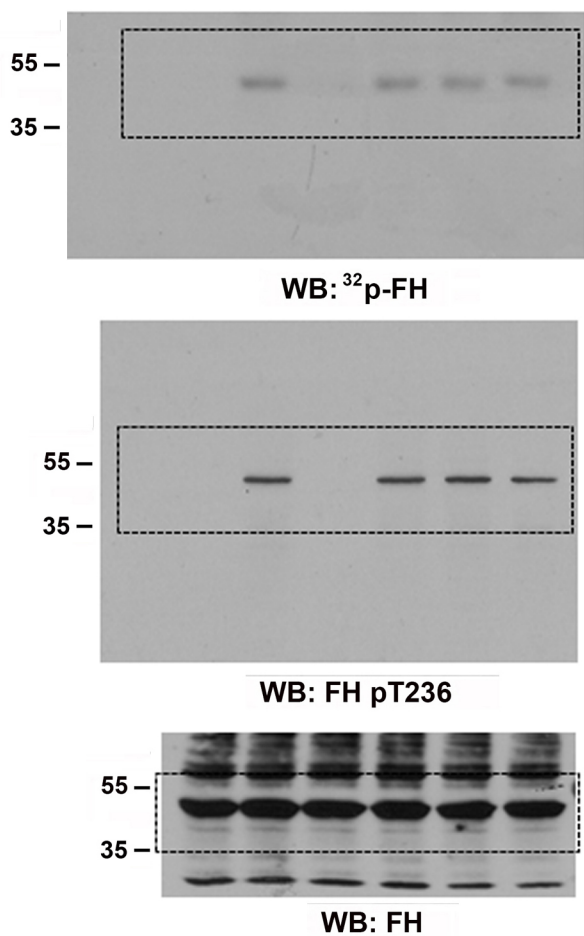

**Fig. 2d**

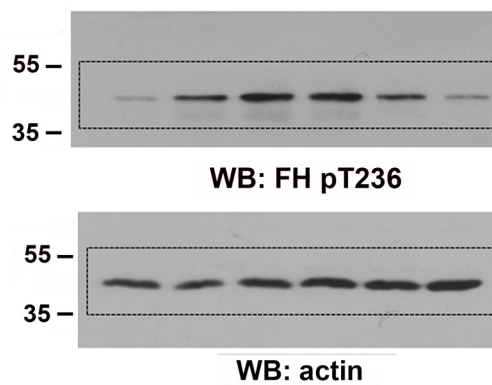

**Fig. 3**

**Fig. 3b**

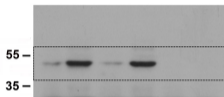

**WB: FH pT236**

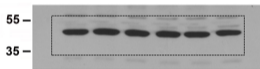

**WB: actin**

**Fig. 3c**

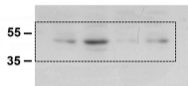

**WB: rFH(N)-Flag**

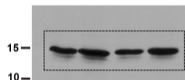

**WB: H2A.Z**

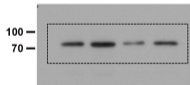

**WB: ku70**

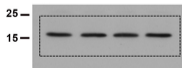

**WB: CENP-A**

**Fig. 4**

**Fig. 4a**

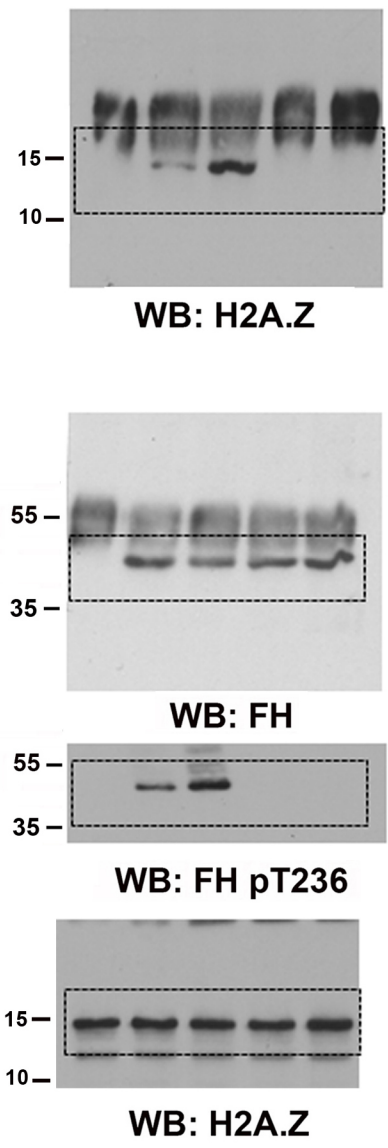

**Fig. 4b**

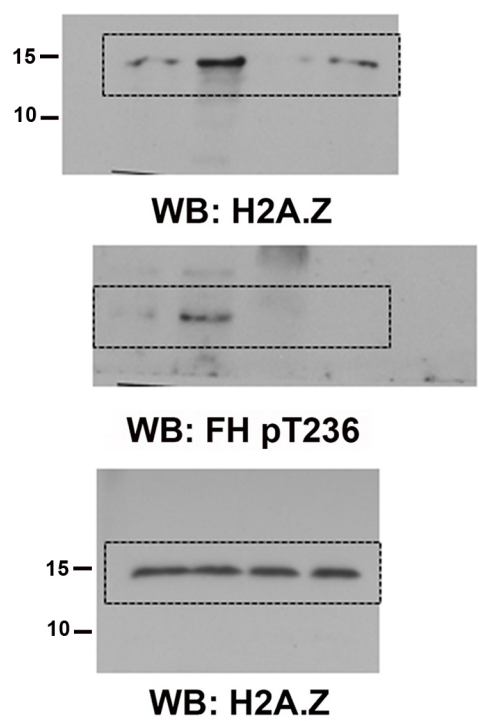

**Fig. 4c left panel**

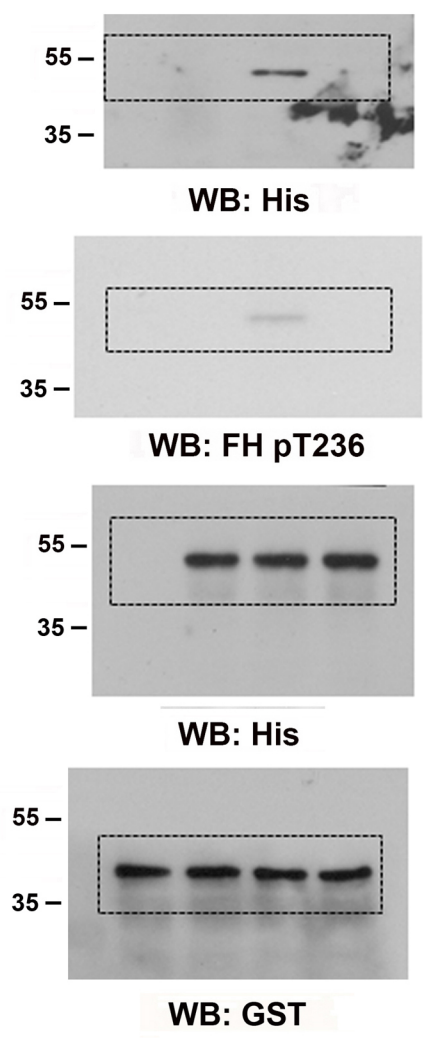

**Fig. 4c right panel**

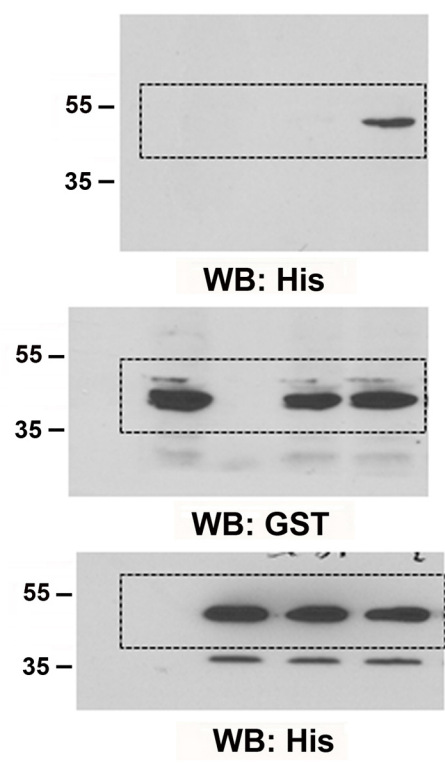

**Fig. 4d**

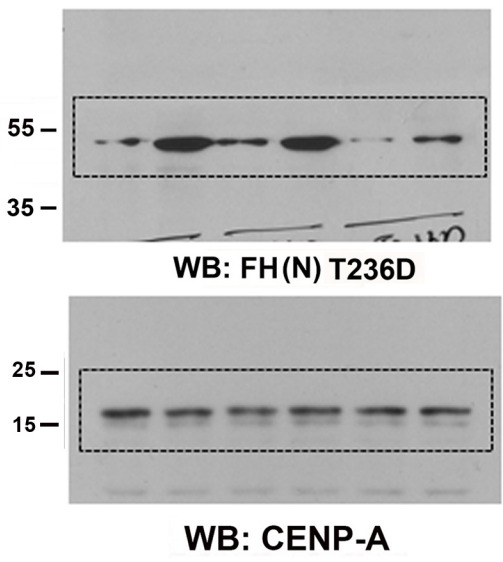

**Fig. 4f**

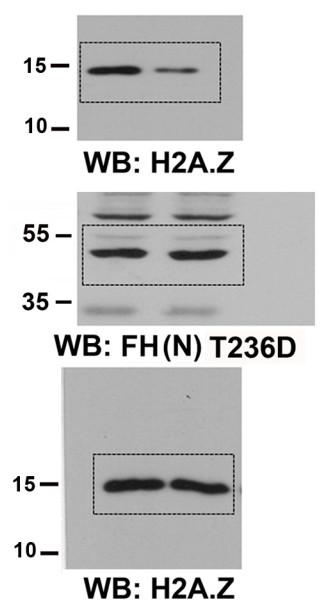

**Fig. 4g**

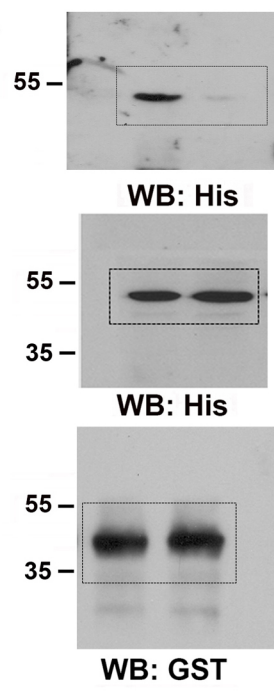

**Fig. 4h**

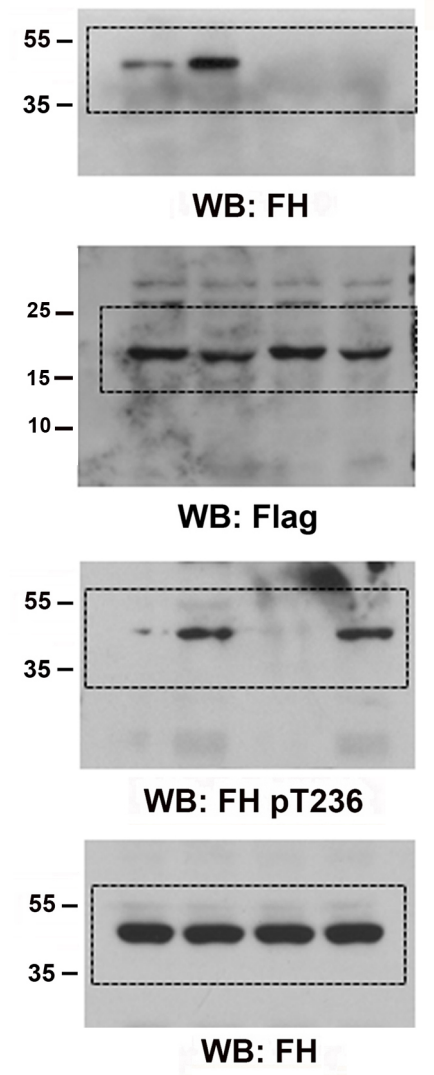

**Fig. 6**

**Fig. 6a left panel**

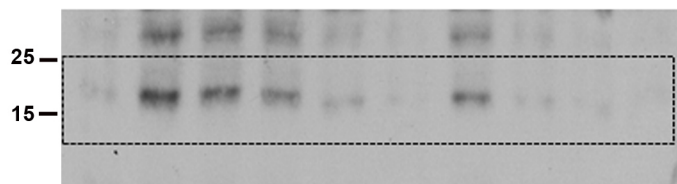

**WB: H3K36Me2**

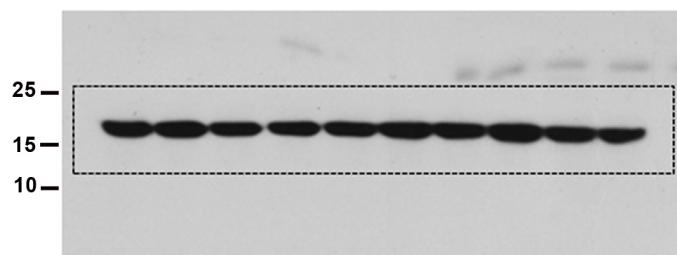

**WB: H3**

**Fig. 6a right panel**

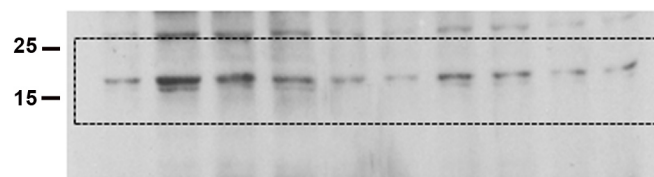

**WB: H3K36Me2**

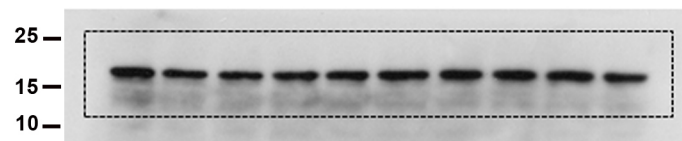

**WB: H3K36Me2**

**Fig. 6h**

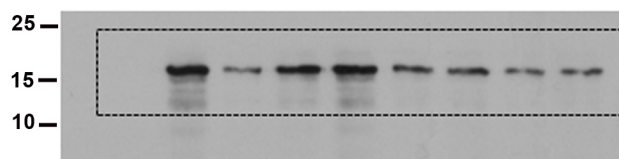

**WB: H3K36Me2**

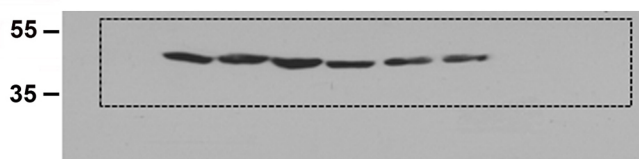

**WB: FH**

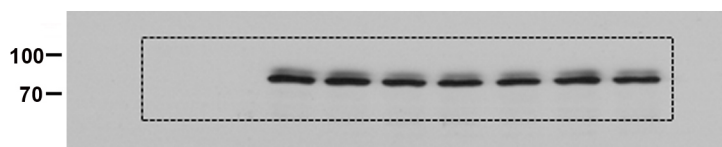

**WB: His-KDM2B**

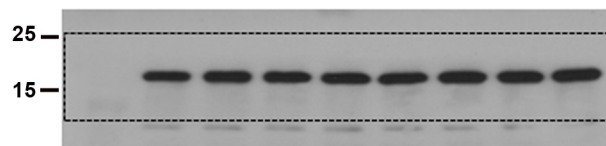

**WB: H3**



**Fig. 7**

**Fig. 7a left panel**

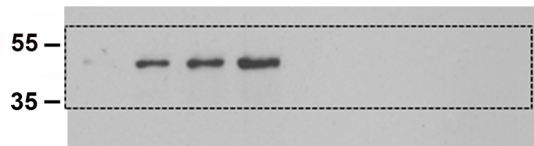

**WB: FH pT236**

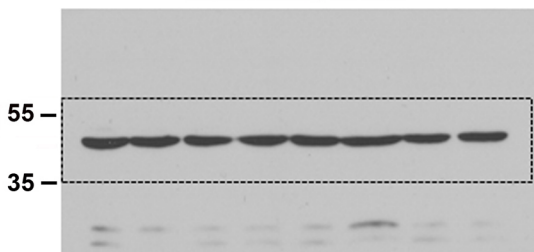

**WB: actin**

**Fig. 7a right panel**

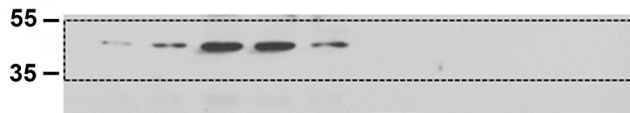

**WB: FH pT236**

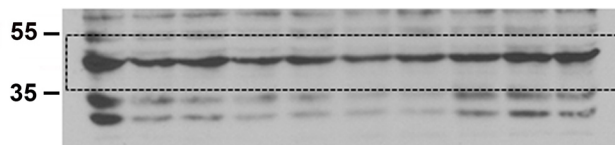

**WB: actin**

**Fig. 7b**

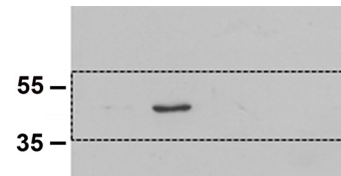

**WB: FH pT236**

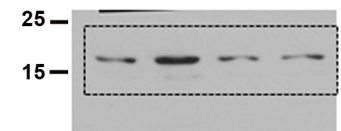

**WB: H3K36Me2**

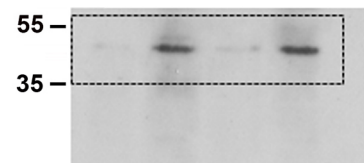

**WB: FH pT236**

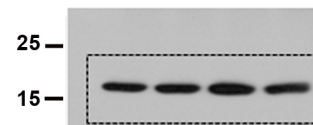

**WB: H3**

**Fig. S2**

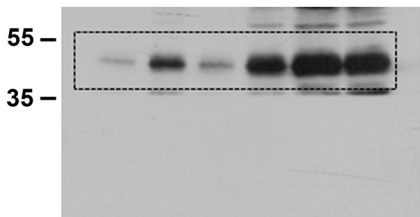

**WB: FH**

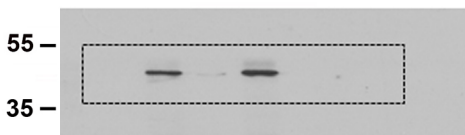

**WB: FH pT236**

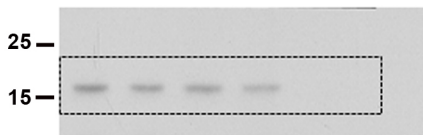

**WB: CENP-A**

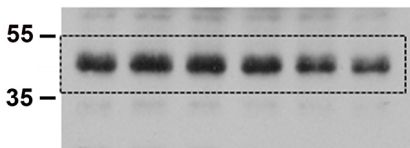

**WB: actin**
